# Supplementary material
Source: PubMed Central journal article supplement (PMC2666604)

## Supporting Information

### Methods

***Cryosections and Immunofluorescence.*** Mouse ovaries were fixed for 48 h at 4°C in 4% paraformaldehyde. After fixing, they were placed in 15% sucrose in phosphate-buffered saline (PBS) overnight at 4°C and 30% sucrose in PBS, successively. The ovaries were then frozen in Tissue-Tec O.C.T. Compound at -60°C. Ovary sections (16 µm) were cut using a MICROM 500M, post-fixed with 4% formaldehyde, washed in PBS, permeabilized and blocked in 0.5% Triton-X 100 in 1% BSA- PBS. Primary antibody (HSF1 polyclonal, rabbit, gift from R.I. Morimoto) was used at 1:500 in 0.1% Triton-X 100 in 0.1%BSA-PBS and incubated overnight at 4°C. Secondary antibody directed against rabbit Ig (Goat anti-rabbit Alexa 546 diluted 1:500) was then applied for 1.5 hr at room temperature. TO-PRO-3 (Molecular Probes) was used at 1:200 in 0.1% Triton-X 100 in PBS for DNA staining. Sections were rinsed in PBS, mounted with Moewiol and analyzed with a Leica TCS SP-5 spectral confocal microscope.

### Figure legends

**Fig. S1.** HSF1 is expressed during ovarian oogenesis. Immunostaining performed on frozen sections of adult ovary reveals HSF1 expression in oocytes (arrowheads) from primordial (*A*), primary (*B*), secondary (*C*) and antral follicles (*D*). Panels (*E*) and (*F*) represent experiments performed with HSF1-deficient ovary sections or without primary antibody, respectively. Each panel comprises immunodetection on the left and TO-PRO-3 staining on the right side. Bar = 10µm (*A, B, C*) and 50 µm (*D, E, F*).

**Fig. S2.** Spindle morphology in GVBD oocytes (*Hsf1*<sup>-/-</sup>). I-X examples of the various spindle morphologies exhibited in *Hsf1*<sup>-/-</sup> oocytes 14 h after IBMX release (green: microtubules; blue: DNA). I–V spindles are not bipolar. VI–X spindles are almost or are completely bipolar.

**Table S1 – List of primers used in RT-qPCR and ChIP experiments**

| <b>Gene symbol</b> | <b>Synonyms</b>                                                                        | <b>Accession number</b> | <b>Sequences</b>                                                     |
|--------------------|----------------------------------------------------------------------------------------|-------------------------|----------------------------------------------------------------------|
| Hspb1              | <b>Hsp25</b>                                                                           | NM_013560               | F5'- CCAGACTG TTCAGACTTCCCAG-3'<br>R5'- ATCCCCTGAGGGCACACTTA-3'      |
| Hspd1              | <b>Hsp60</b> ,<br>chaperonin                                                           | NM_010477               | F5'- GCCATGCTTGGAGATTTTGT-3'<br>R5'- CCATTCCAGGGTCCTTCTCT-3'         |
| Hspa1b             | <b>Hsp70.1</b><br>Hsp70-1<br>hsp68<br>Hsp70<br>HSP70A1                                 | NM_010478               | F5'- TGTTCAGTAGCCTGGGAAG 3'<br>R5'- CCACAAAACCTTAACATGGACA-3'        |
| Hspa1a             | <b>Hsp70.3</b><br>Hsp70-3                                                              | NM_010479               | F5'- TTCCAGTAGCCTGGGAAGAC -3'<br>R5'- CCACAAAACCTTAACATGGACA -3'     |
| Hsp90aa1           | <b>Hsp90α</b><br>86kDa,<br>89kDa,<br>hsp4,<br>Hsp86-1,<br>Hsp89,<br>Hsp90,<br>Hspca    | NM_010480               | F5'- AAGGCAGAGGCTGACAAGA-3'<br>R5'- AGGGGAGGCATTTCTTCAGT-3'          |
| Hsp90aa1           | <b>Hsp90α</b><br>(ChIP)                                                                | NM_010480               | F5'- CTTGCGTTCGTTCTCCGC-3'<br>R5'- CGCACCAGGACACTGAAGC -3'           |
| Hsp90ab1           | <b>Hsp90β</b><br>90kDa,<br>Hsp84,<br>Hsp84-1,<br>Hsp90,<br>Hspcb                       | NM_008302               | F5'- AAGGCTAGGCAGACAAAA-3'<br>R5'- GGGATCTCATCAGGAACAGC-3'           |
| Hsph1              | <b>Hsp105</b><br>hsp-E7I,<br>Hsp105,<br>HSP110                                         | NM_013559               | F5'-TGAAATCAGAGCGAAGGTCA-3'<br>R5'-TTAGGGTGGCATTACCATT-3'            |
| Pou5f1             | <b>Oct4</b><br>Oct-3,<br>Oct-3/4,<br>Otf-3,<br>Otf-4,<br>Otf3-rs7,<br>Otf3g,<br>(ChIP) | NM_013633               | F5'- CAG GCC GAG AGG GTG CA-3'<br>R5'- GTG GAA AGA CGG CTC ACC TA-3' |
| Rps16              | <b>S16</b><br>ribosomal<br>protein S16                                                 | NM_013647               | F5'- AGGAGCGATTTGCTGGTGTGG-3'<br>R5'- GCTACCAGGGCCTTTGAGATGGA -3'    |

**Table S2 – Antibodies used in Western blot (WB) and immunostaining (IS) experiments**

| <b>Protein Symbol</b>              | <b>Antibody name (species, type)</b>                                | <b>Dilution</b>      | <b>Source</b>                                               |
|------------------------------------|---------------------------------------------------------------------|----------------------|-------------------------------------------------------------|
| AKT                                | Anti-PKB<br>(rabbit polyclonal)                                     | 1:400                | KAP-PK004<br>Stressgen Bioreagents                          |
| CDK1                               | Cdc2-p34<br>(mouse monoclonal)                                      | 1:200                | Sc-54<br>Santa Cruz biotechnology                           |
| ERK 1/2                            | p44/42 MAP kinase<br>(rabbit polyclonal)                            | 1:1000               | #9102<br>Cell signaling technology                          |
| ERK 1/2-P                          | Phospho-p44/42 MAP kinase<br>(Thr202/Tyr204)<br>(rabbit polyclonal) | 1:1000               | #9101<br>Cell signaling technology                          |
| HSF1                               | HSF1<br>(rabbit polyclonal)                                         | 1:500                | gift from Dr R Morimoto                                     |
| Hsp90 $\alpha$                     | Heat shock protein 86<br>(rabbit polyclonal)                        | 1:1000<br>1:200 (IS) | PA3-013<br>Affinity BioReagents (ABR)                       |
| Hsp90 $\beta$                      | Heat shock protein 84<br>(rabbit polyclonal)                        | 1:1000<br>1:200 (IS) | PA3-012<br>Affinity BioReagents (ABR)                       |
| PLK1                               | Mouse anti-Plk<br>(mouse monoclonal : PL6-2)                        | Mouse<br>1:500       | 33-1700<br>Zymed Laboratories<br>Invitrogen immunodetection |
| $\alpha$ TUBULIN                   | Anti- $\alpha$ -Tubulin<br>(mouse monoclonal : DM1A)                | 1:1000 (WB)          | T 9026<br>SIGMA                                             |
| $\alpha$ TUBULIN<br>FITC conjugate | Anti- $\alpha$ -Tubulin<br>(mouse monoclonal : DM1A)                | 1:100 (IS)           | F 2168<br>SIGMA                                             |

**Table S3- Timing of meiotic progression in Hsp90-depleted (*Hsf1*<sup>-/-</sup>) and Hsp90-inhibited (17AAG) oocytes.**

|                              | Effect of Hsp90 depletion  |                            | Effect of Hsp90 inhibition<br>(without preincubation) |                                       |
|------------------------------|----------------------------|----------------------------|-------------------------------------------------------|---------------------------------------|
|                              | <i>Hsf1</i> <sup>+/+</sup> | <i>Hsf1</i> <sup>-/-</sup> | <i>Hsf1</i> <sup>+/+</sup><br>(DMSO)                  | <i>Hsf1</i> <sup>+/+</sup><br>(17AAG) |
| Oocytes (n)                  | 90                         | 95                         | 24                                                    | 44                                    |
| GV – GVBD <sup>a</sup> (min) | 69.5±8.65                  | 285±26                     | 105±16                                                | 92.7±5.04                             |
| GV – GVBD <sup>b</sup> (min) | 58±4.9                     | 156±18.2                   | ND                                                    | ND                                    |
| GVBD – PBE1 (min)            | 727±20.9                   | 746±36.5                   | 554±41.12                                             | 680±18.2                              |

<sup>a</sup> Timing calculated from the entire group of experimental oocytes. <sup>b</sup> Timing calculated from the group of experimental oocytes that had completed meiosis I and extruded the 1<sup>st</sup> polar body (PBE1).

Figure S1

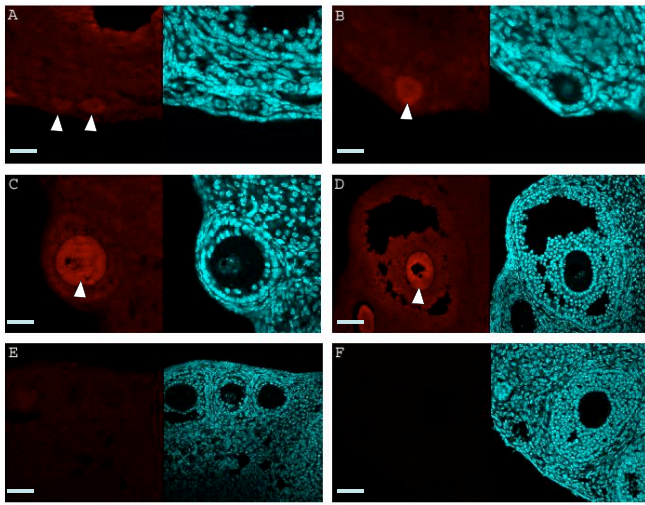

Figure S2

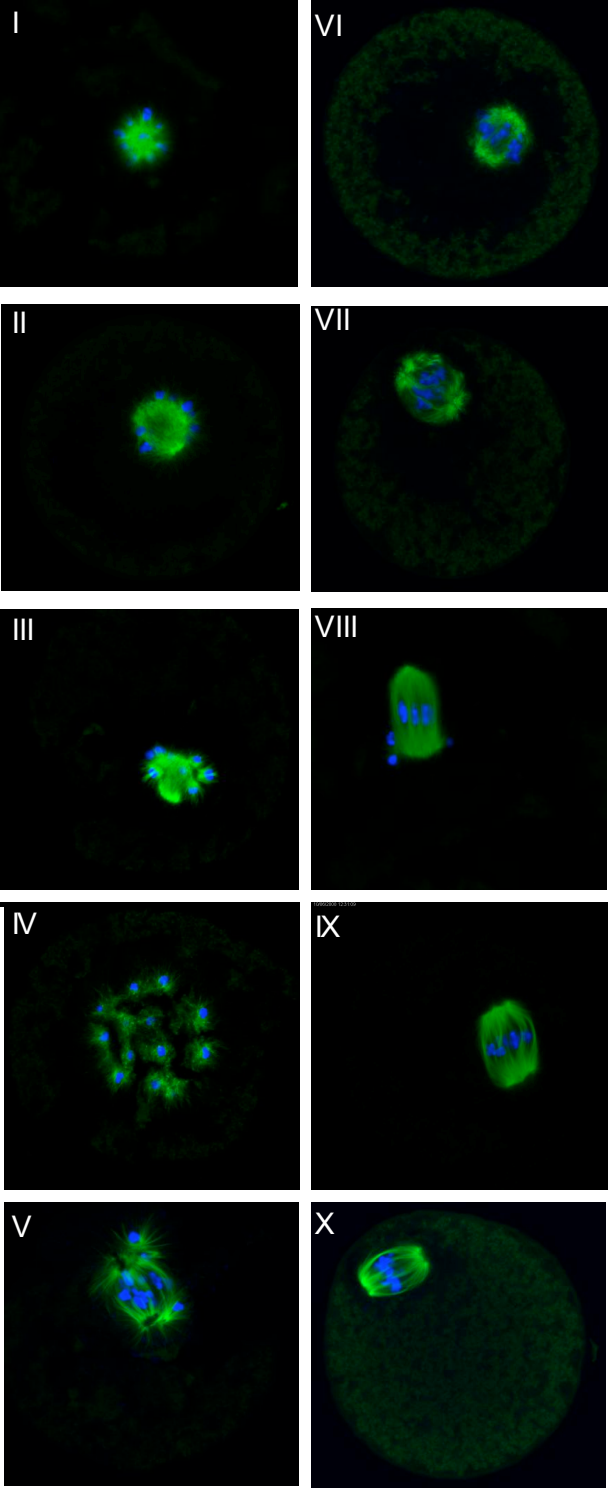

Supplement: M808819200_1.pdf [file M808819200_1.pdf]
